# Supplementary material
Source: Springer Nature journal article supplement (https://www.springermedizin.de/resource/supplementary/13018_2006_15_MOESM2_ESM.pdf/9636134)

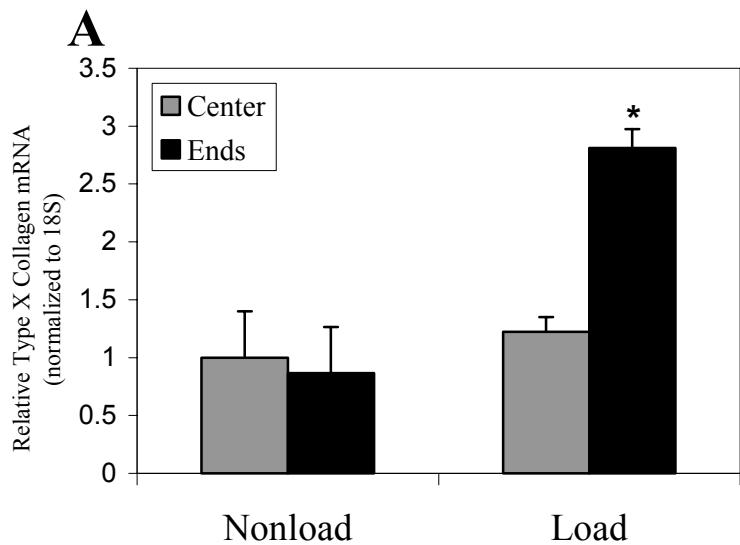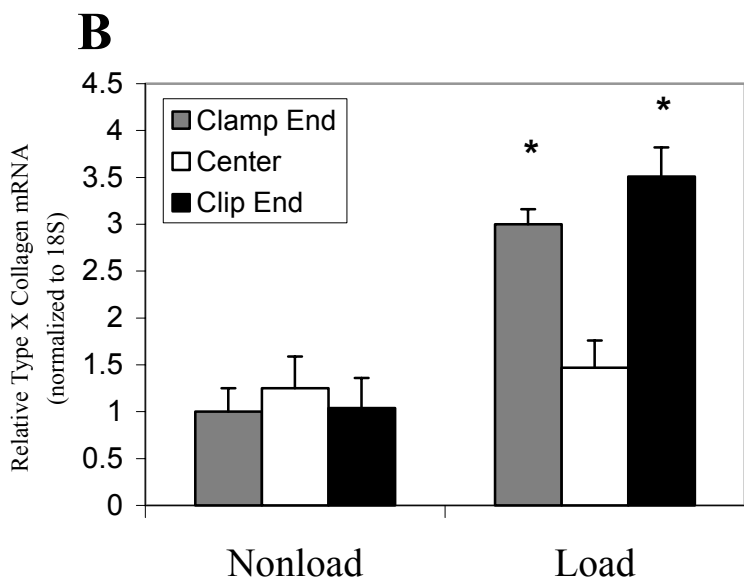

Supplement: MOESM2 [file 9636134]
